# Supplementary material for: Influence of Instant Controlled Pressure Drop (DIC) on Allergenic Potential of Tree Nuts
Source: Preprints.org preprint supplement (doi:10.20944/preprints202002.0204.v2), 2020-03-26
Supplement: Supplementary file 1 [file supplementary]

**Figure S1 SM:** IgE immunoblot of pistachio (A) and cashew (B) proteins of untreated (top) and DIC 7b 120'' treated samples (bottom) (20μg protein/lane). IgE immunoblots were carried out using individual sera from 11 patients allergic to pistachio and cashew (Lanes 1-11). Lane C represents a negative control serum.

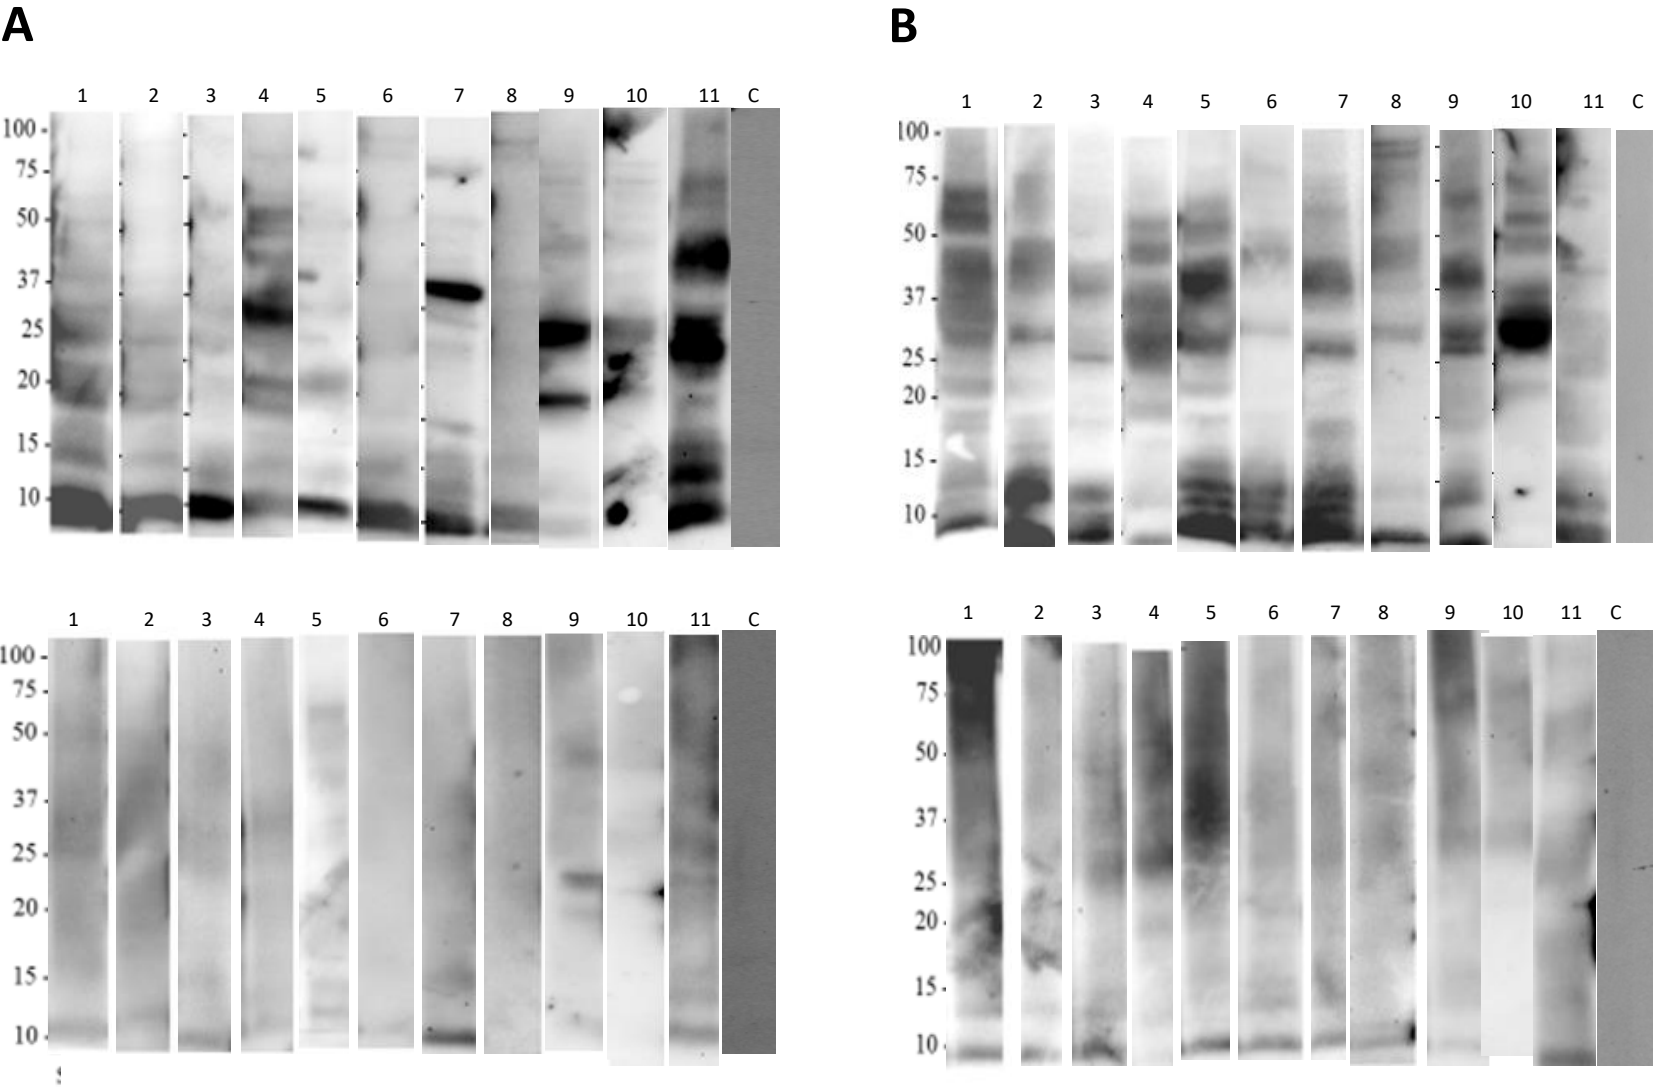

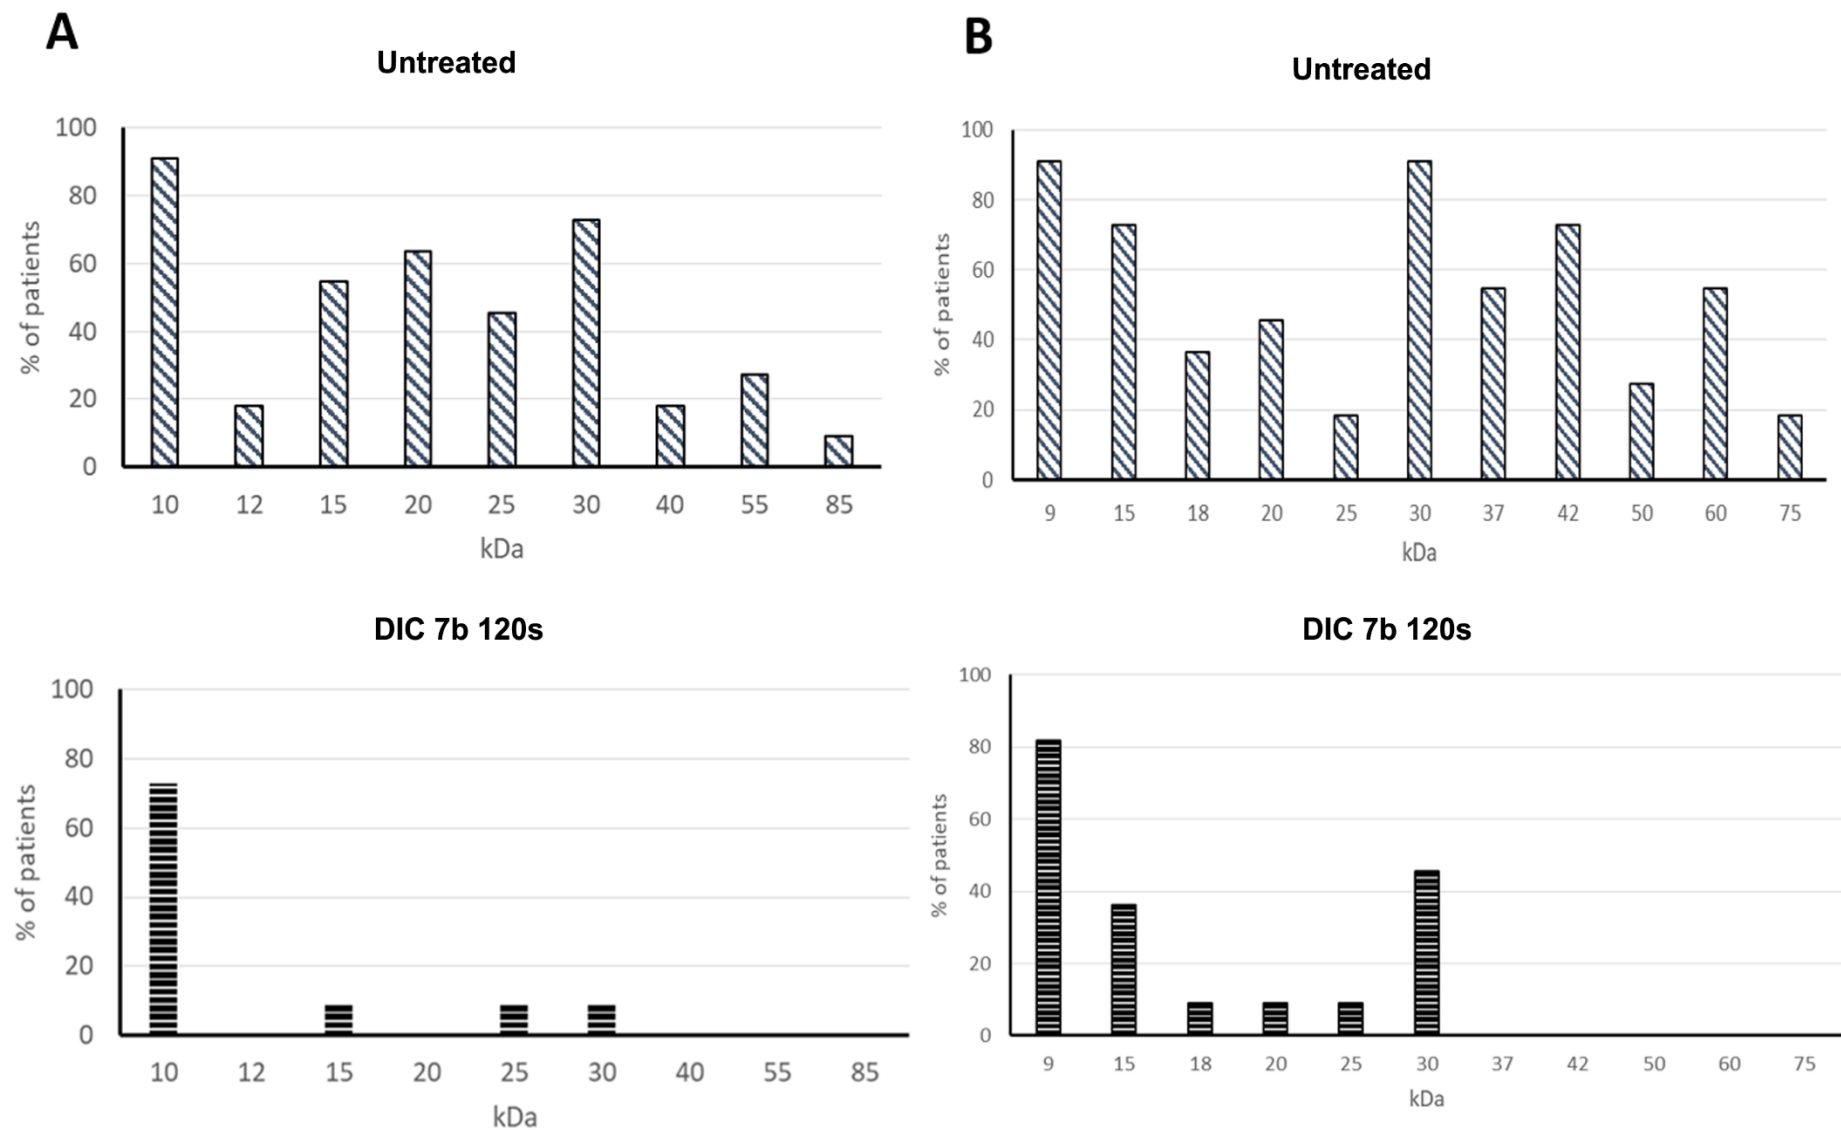

**Figure S2 SM.** IgE immunoreactive protein bands. Percentage of patients that immunoreact with each protein band of pistachio (A) and cashew (B) untreated and treated by DIC 7 bar 120 seconds. Analysis performed with Quantity One Software (BioRad).
